# Supplementary material for: Three-dimensional spatial transcriptomics uncovers cell type localizations in the human rheumatoid arthritis synovium
Source: PubMed Central journal article supplement (PMC8837632; doi:10.1038/s42003-022-03050-3), 2022-02-11
Supplement: 42003_2022_3050_MOESM2_ESM.pdf [file 42003_2022_3050_MOESM2_ESM.pdf]

## Description of Additional Supplementary Files

**File name:** Supplementary Data 1

**Description:** Differentially expressed genes in infiltrate structures (RA1-6).

**File name:** Supplementary Data 2

**Description:** Differentially expressed genes in all tissue sections (RA1-6).

**File name:** Supplementary Data 3

**Description:** Spatial cell type signatures in all tissue sections (RA1-6).
